# Supplementary material for: Converting food waste into high-value medium chain fatty acids and long chain alcohols via chain elongation with an internally produced electron donor
Source: Royal Society of Chemistry journal article supplement (doi:10.1039/d3gc03614f), 2023-01-01
Supplement: d3gc03614f1.pdf [file d3gc03614f1.pdf]

## Supporting Information

### **Converting Food Waste into High-value Medium Chain Fatty Acids and Long Chain Alcohols via Chain Elongation with Internally Produced Electron Donor**

Lan Wu <sup>1</sup>, Wei Wei <sup>1,\*</sup>, Jin Qian <sup>3</sup>, Xueming Chen <sup>4</sup>, Bing-Jie Ni <sup>1,2\*</sup>

<sup>1</sup> Centre for Technology in Water and Wastewater, School of Civil and Environmental Engineering, University of Technology Sydney, Sydney, NSW 2007, Australia

<sup>2</sup> School of Civil and Environmental Engineering, The University of New South Wales, Sydney, NSW 2052, Australia

<sup>3</sup> Research & Development Institute in Shenzhen & School of Chemistry and Chemical Engineering, Northwestern Polytechnical University, P. R. China

<sup>4</sup> Fujian Provincial Engineering Research Center of Rural Waste Recycling Technology, College of Environment and Safety Engineering, Fuzhou University, Fuzhou 350116, China

#### **\*Corresponding authors:**

Prof. Bing-Jie Ni, E-mail: [bingjieni@gmail.com](mailto:bingjieni@gmail.com)

Dr. Wei Wei, E-mail: [wei.wei@uts.edu.au](mailto:wei.wei@uts.edu.au)

**Table S1** FW composition and values in different countries.

| Countries or regions | FW composition                                                                                       | FW volume                                                                                                                                                                                                       | GNI                                                                                                                                                                                                                                                                                   | The proportion of bioresource recovery via AD |
|----------------------|------------------------------------------------------------------------------------------------------|-----------------------------------------------------------------------------------------------------------------------------------------------------------------------------------------------------------------|---------------------------------------------------------------------------------------------------------------------------------------------------------------------------------------------------------------------------------------------------------------------------------------|-----------------------------------------------|
| Denmark              | Carbohydrate mainly, including wheat, sugar, pasta, rice, etc. <sup>1</sup>                          | 2.2 million tons. <sup>2</sup>                                                                                                                                                                                  | 65,520 US\$                                                                                                                                                                                                                                                                           | 10%                                           |
| Canada               | Carbohydrate mainly.                                                                                 | <ul style="list-style-type: none"> <li>• 12.6 million tons of FW was directly sent to landfill for final disposal.</li> <li>• 5.8 million tons of organics FW are diverted to alternative treatment.</li> </ul> | <ul style="list-style-type: none"> <li>• The monetary value of avoidable food loss and waste alone was US\$ 27 billion in 2010.<sup>3</sup></li> <li>• Such value is slightly lower than the value of all Canadian agricultural and agri-food exports in 2007.<sup>3</sup></li> </ul> | -                                             |
| US                   | Carbohydrate mainly. Lipid and other carbon containing materials are also the key composition of FW. | 28.8 million tons. <sup>4</sup>                                                                                                                                                                                 | <ul style="list-style-type: none"> <li>• 53,670 US\$</li> <li>• Accounting for \$75 billion of the American economy annually in total.<sup>5</sup></li> </ul>                                                                                                                         | <3% <sup>4</sup>                              |
| China                | Carbohydrate mainly. Rice and pasta contribute to up to 70.2% of FW. <sup>6</sup>                    | 82.8 million tons. <sup>7</sup>                                                                                                                                                                                 | 6,560 US\$                                                                                                                                                                                                                                                                            | 7% <sup>6</sup>                               |
| South Korea          | Carbohydrate mainly.                                                                                 | 4.2-5.5 million tons. <sup>8</sup>                                                                                                                                                                              | 25,920 US\$<br>Only 10% of the FW was treated via AD in 2008.                                                                                                                                                                                                                         | 10% <sup>9</sup>                              |

*AD: anaerobic digestion; GNI: Gross National Index.*

## 1 Electron transfer efficiency of the various fermentative systems

The electron transfer efficiency indicated how many electrons from food waste (FW) were transferred to the fermentative products. The electron transfer efficiency in the fermentation system with or without yeast inoculation was calculated using **Eq. 1**. All the involved compounds and their electrons are: 12/ethanol, 18/propanol, 24/butanol, 30/pentanol, 36/hexanol, 2/H<sub>2</sub>, 8/acetate, 14/propionate, 20/butyrate, 26/valerate, 32/caproate, 38/heptylate, 44/caprylate.<sup>10, 11</sup> **Table S2** demonstrated the electron transfer efficiency in various fermentative systems.

$$\text{Electron efficiency \%} = \frac{\text{Products (mmol } e^{-})}{\text{FW (mmol } e^{-})} \quad 1)$$

**Table S2** Electron transfer efficiency in various fermentative systems.

| Fermentation system | Electron efficiency (%) |
|---------------------|-------------------------|
| Control             | 18.08                   |
| 1Y                  | 19.32                   |
| 1.5Y                | 41.04                   |
| 3Y                  | 51.46                   |
| 4Y                  | 61.18                   |

**Table S3** The Standard free Gibbs energy ( $\Delta_f G^0_{i,Ts}$ ) of possible substances involved in MCFAs and butanol production from FW-contained fermentation with in-situ ethanol provision. The values were adapted or calculated according to Kleerebezem and Van Loosdrecht (2010).<sup>12</sup>

| Name             | $\Delta_f G^0_{i,Ts}$ (KJ/mol) |
|------------------|--------------------------------|
| H <sub>2</sub> O | -237.2                         |
| ethanol          | -181.8                         |
| n-butanol        | -171.8                         |
| acetate          | -369.4                         |
| propionate       | -367.3                         |
| n-butyrate       | -358.7                         |
| n-valerate       | -350.2                         |
| n-caproate       | -341.8                         |
| n-heptanoate     | -333.2                         |
| n-caprylate      | -324.6                         |
| H <sup>+</sup>   | 0                              |
| H <sub>2</sub>   | 0                              |
| CO <sub>2</sub>  | -394.4                         |
| Glucose          | -910.56                        |

**Table S4** Thermodynamic information for the chain elongation reactions, butanol production and in-situ ethanol biosynthesis (Ts: temperature of standard condition)

| Equation                                                                                                                                                                                         | $\Delta G^0_{Ts}$<br>(KJ mol <sup>-1</sup> ) |
|--------------------------------------------------------------------------------------------------------------------------------------------------------------------------------------------------|----------------------------------------------|
| <b>Chain elongation</b>                                                                                                                                                                          |                                              |
| Re.1 $6\text{CH}_3\text{CH}_2\text{OH} + 5\text{CH}_3(\text{CH}_2)_4\text{COOH} \rightarrow 5\text{CH}_3(\text{CH}_2)_6\text{COOH} + 4\text{H}_2\text{O} + 2\text{H}_2 + \text{CH}_3\text{COOH}$ | -141.4                                       |
| Re.2 $6\text{CH}_3\text{CH}_2\text{OH} + 5\text{CH}_3(\text{CH}_2)_3\text{COOH} \rightarrow 5\text{CH}_3(\text{CH}_2)_5\text{COOH} + 4\text{H}_2\text{O} + 2\text{H}_2 + \text{CH}_3\text{COOH}$ | -142.4                                       |
| Re.3 $6\text{CH}_3\text{CH}_2\text{OH} + 5\text{CH}_3(\text{CH}_2)_2\text{COOH} \rightarrow 5\text{CH}_3(\text{CH}_2)_4\text{COOH} + 4\text{H}_2\text{O} + 2\text{H}_2 + \text{CH}_3\text{COOH}$ | -142.9                                       |
| Re.4 $6\text{CH}_3\text{CH}_2\text{OH} + 4\text{CH}_3\text{COOH} \rightarrow 5\text{CH}_3(\text{CH}_2)_2\text{COOH} + 4\text{H}_2\text{O} + 2\text{H}_2$                                         | -173.9                                       |
| Re.5 $12\text{CH}_3\text{CH}_2\text{OH} + 3\text{CH}_3\text{COOH} \rightarrow 5\text{CH}_3(\text{CH}_2)_4\text{COOH} + 8\text{H}_2\text{O} + 4\text{H}_2$                                        | -316.8                                       |
| Re.6 $18\text{CH}_3\text{CH}_2\text{OH} + 2\text{CH}_3\text{COOH} \rightarrow 5\text{CH}_3(\text{CH}_2)_6\text{COOH} + 12\text{H}_2\text{O} + 6\text{H}_2$                                       | -458.2                                       |
| Re.7 $12\text{CH}_3\text{CH}_2\text{OH} + 5\text{CH}_3\text{CH}_2\text{COOH} \rightarrow 5\text{CH}_3(\text{CH}_2)_5\text{COOH} + 8\text{H}_2\text{O} + 4\text{H}_2 + 2\text{CH}_3\text{COOH}$   | -273.8                                       |
| <b>Butanol production</b>                                                                                                                                                                        |                                              |
| Re.8 $\text{CH}_3(\text{CH}_2)_2\text{COOH} + 2\text{H}_2 \rightarrow \text{CH}_3(\text{CH}_2)_2\text{CH}_2\text{OH} + \text{H}_2\text{O}$                                                       | -50.3                                        |
| <b>In-situ ethanol production</b>                                                                                                                                                                |                                              |
| Re.9 $\text{C}_6\text{H}_{12}\text{O}_6 \rightarrow 2\text{C}_2\text{H}_5\text{OH} + 2\text{CO}_2$                                                                                               | -241.84                                      |

**Table S5** Abundance of genes involved in MCFAs, butanol and their key precursors production in different reactors.

| KO                                                        | Enzyme ID | Control | 1Y     | 4Y     | Description                                                                                                     |
|-----------------------------------------------------------|-----------|---------|--------|--------|-----------------------------------------------------------------------------------------------------------------|
| <b><i>Butanol production via ABE pathway</i></b>          |           |         |        |        |                                                                                                                 |
| K00248                                                    | 1.3.8.1   | 0.0117  | 0.0135 | 0.0133 | butyryl-CoA dehydrogenase                                                                                       |
| K00100                                                    | 1.1.1.-   | 0.0001  | 0.0005 | 0.0086 | butanol dehydrogenase                                                                                           |
| <b><i>Butanol reduction via Butanoate mechanism</i></b>   |           |         |        |        |                                                                                                                 |
| K04073                                                    | 1.2.1.10  | 0.0105  | 0.0069 | 0.0044 | acetaldehyde dehydrogenase                                                                                      |
| K18366                                                    | 1.2.1.10  | 0.0037  | 0.0033 | 0.0019 | acetaldehyde/propanal dehydrogenase                                                                             |
| <b><i>Chain elongation</i></b>                            |           |         |        |        |                                                                                                                 |
| K01961                                                    | 6.4.1.2   | 0.0445  | 0.0572 | 0.0612 | acetyl-CoA carboxylase, biotin carboxylase subunit                                                              |
| K00645                                                    | 2.3.1.39  | 0.0377  | 0.0459 | 0.0533 | [acyl-carrier-protein] S-malonyltransferase                                                                     |
| K09458                                                    | 2.3.1.179 | 0.0747  | 0.0808 | 0.1017 | 3-oxoacyl-[acyl-carrier-protein] synthase II                                                                    |
| K16363                                                    | 4.2.1.59  | 0.0042  | 0.0114 | 0.0232 | UDP-3-O-[3-hydroxymyristoyl] N-acetylglucosamine deacetylase / 3-hydroxyacyl-[acyl-carrier-protein] dehydratase |
| K02371                                                    | 1.3.1.9   | 0.0096  | 0.0142 | 0.0220 | enoyl-[acyl-carrier protein] reductase II                                                                       |
| K01075                                                    | 3.1.2.23  | 0.0073  | 0.0077 | 0.0058 | 4-hydroxybenzoyl-CoA thioesterase                                                                               |
| <b><i>Butyrate production</i></b>                         |           |         |        |        |                                                                                                                 |
| K00634                                                    | 2.3.1.19  | 0.0037  | 0.0060 | 0.0021 | phosphate butyryltransferase                                                                                    |
| K01034                                                    | 2.8.3.8   | 0.0019  | 0.0034 | 0.0022 | acetate CoA/acetoacetate CoA-transferase alpha subunit                                                          |
| K01035                                                    | 2.8.3.8   | 0.0017  | 0.0028 | 0.0020 | acetate CoA/acetoacetate CoA-transferase beta subunit                                                           |
| <b><i>Ethanol production via yeast</i></b>                |           |         |        |        |                                                                                                                 |
| K00128                                                    | 1.2.1.3   | 0.0725  | 0.0918 | 0.0931 | aldehyde dehydrogenase (NAD+)                                                                                   |
| <b><i>Acetyl-CoA production via ethanol reduction</i></b> |           |         |        |        |                                                                                                                 |
| K19955                                                    | 1.1.1.-   | 0.0017  | 0.0035 | 0.0065 | alcohol dehydrogenase                                                                                           |
| <b><i>Acetate production</i></b>                          |           |         |        |        |                                                                                                                 |
| K00625                                                    | 2.3.1.8   | 0.0190  | 0.0288 | 0.0407 | phosphate acetyltransferase                                                                                     |

### Idea conception

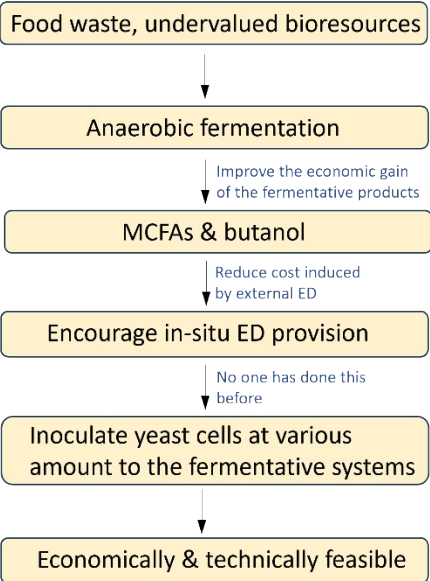

### Batch tests steps

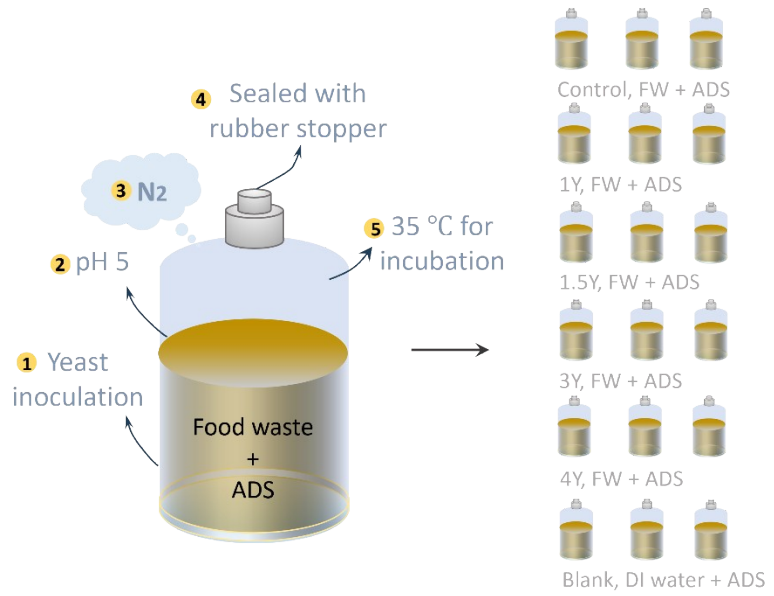

**Fig. S1** The flow diagram and experimental design of producing MCFAs and butanol from FW-fed fermentation systems.

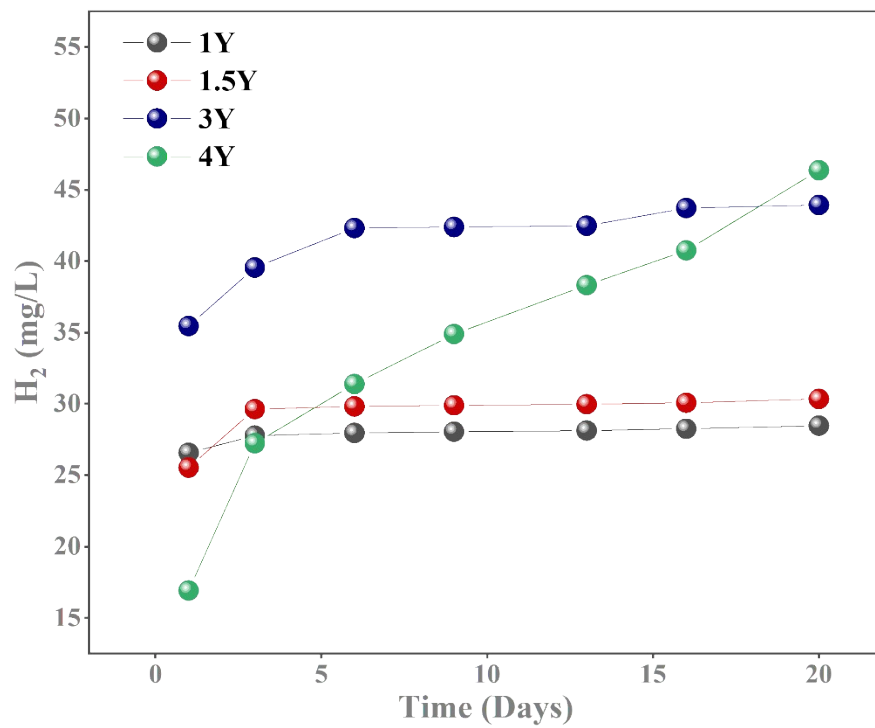

**Fig. S2** The accumulated H<sub>2</sub> concentration in the yeast-inoculated systems.



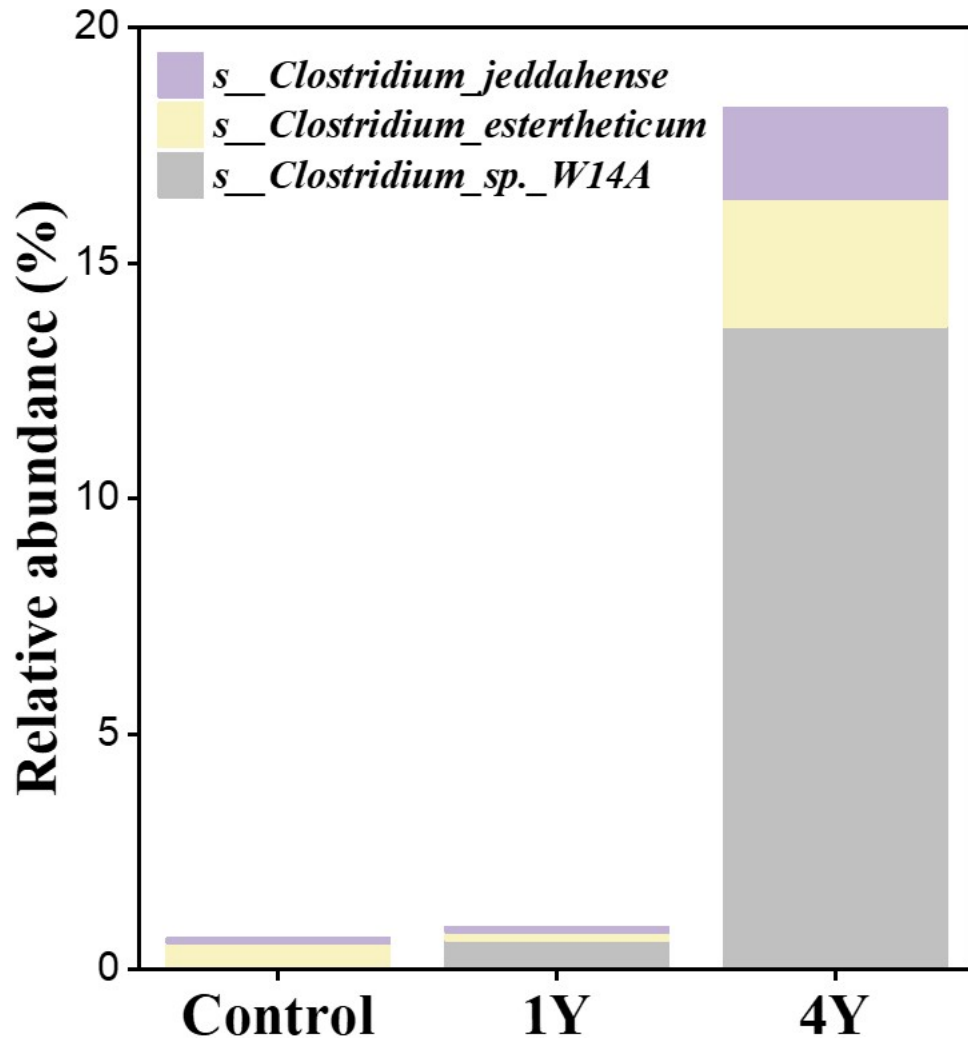

**Fig. S3** The relative abundance the *Clostridium* species with the potential to produce butanol. The functions of these microbial species were proposed based on former studies.<sup>13-15</sup>

## Reference

1. C. Cicatiello, S. Franco, B. Pancino and E. Blasi, *J. Retail. Consum. Serv.*, 2016, **30**, 96-104.
2. N. B. Thi, G. Kumar and C. Y. Lin, *J. Environ. Manage.*, 2015, **157**, 220-229.
3. **M. Gooch, A. Felfel** and N. Marenick, 2010.
4. J. W. Levis, M. A. Barlaz, N. J. Themelis and P. Ulloa, *Waste Manag.*, 2010, **30**, 1486-1494.
5. M. Melikoglu, C. Lin and C. Webb, *Open Eng.*, 2013, **3**.
6. Y. Li, Y. Jin, A. Borrión and H. Li, *Bioresour. Technol.*, 2019, **273**, 654-665.
7. S. K. Karmee, *Renew. Sust. Energ. Rev.*, 2016, **53**, 945-953.
8. D. D. Nguyen, J. S. Yeop, J. Choi, S. Kim, S. W. Chang, B. H. Jeon, W. Guo and H. H. Ngo, *Waste Manag.*, 2017, **66**, 161-168.
9. M. Ju, S.-J. Bae, J. Y. Kim and D.-H. Lee, *J. Mater. Cycles Waste Manag.*, 2016, **18**, 419-426.
10. Q. Wu, W. Guo, S. You, X. Bao, H. Luo, H. Wang and N. Ren, *Bioresour. Technol.*, 2019, **291**, 121573.
11. Y. Wang, W. Wei, S. L. Wu and B. J. Ni, *Environ. Sci. Technol.*, 2020, **54**, 10904-10915.
12. R. Kleerebezem and M. C. M. Van Loosdrecht, *Crit. Rev. Environ. Sci. Technol.*, 2010, **40**, 1-54.
13. Y. He, P. N. L. Lens, M. C. Veiga and C. Kennes, *Front. Bioeng. Biotechnol.*, 2022, **10**, 828316.
14. J. Wambui, M. J. A. Stevens, N. Cernela and R. Stephan, *Front. Microbiol.*, 2022, **13**, 856810.
15. E. E. Ziganshina, W. S. Mohammed and A. M. Ziganshin, *BMC Res. Notes*, 2020, **13**, 413.
